# Supplementary material for: Structural basis for the inhibition of voltage-dependent K+ channel by gating modifier toxin
Source: PubMed Central journal article supplement (PMC4585561; doi:10.1038/srep14226), 2015-09-18
Supplement: srep14226-s1.pdf [file srep14226-s1.pdf]

## Structural basis for the inhibition of voltage-dependent K<sup>+</sup> channel by gating modifier toxin

Shin-ichiro Ozawa<sup>1</sup>, Tomomi Kimura<sup>1</sup>, Tomohiro Nozaki<sup>1</sup>, Hitomi Harada<sup>1</sup>, Ichio Shimada<sup>1</sup>, and Masanori Osawa<sup>1,2,\*</sup>

<sup>1</sup>Graduate School of Pharmaceutical Sciences, The University of Tokyo, Hongo, Bunkyo-ku, Tokyo 113-0033, Japan

<sup>2</sup>Keio University Faculty of Pharmacy, Shibakoen, Minato-ku, Tokyo 105-8512, Japan

\*Correspondence to osawa-ms@pha.keio.ac.jp

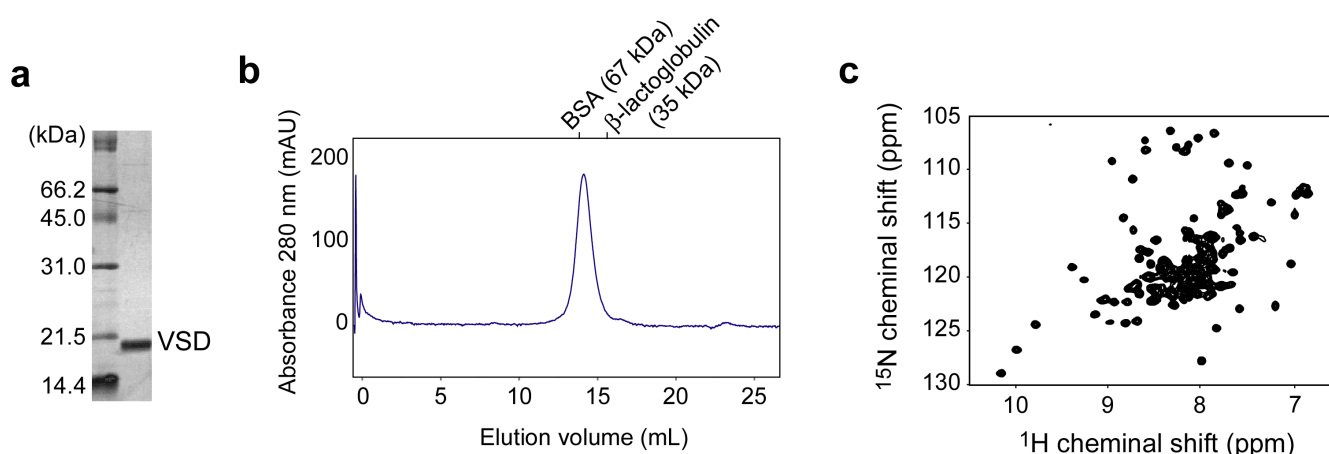

### Supplementary Figure S1: Characterization of VSD.

(a) SDS-PAGE analysis of the purified VSD. (b) The gel filtration analysis of VSD solubilized in DM micelles. VSD was eluted at the elution volume corresponding to the molecular weight 60-65 kDa, which presumably consists of a VSD monomer (17 kDa) and a DM micelle (45-50 kDa). (c) <sup>1</sup>H-<sup>15</sup>N TROSY spectrum of uniformly <sup>2</sup>H, <sup>15</sup>N-labeled VSD in the presence of DM.

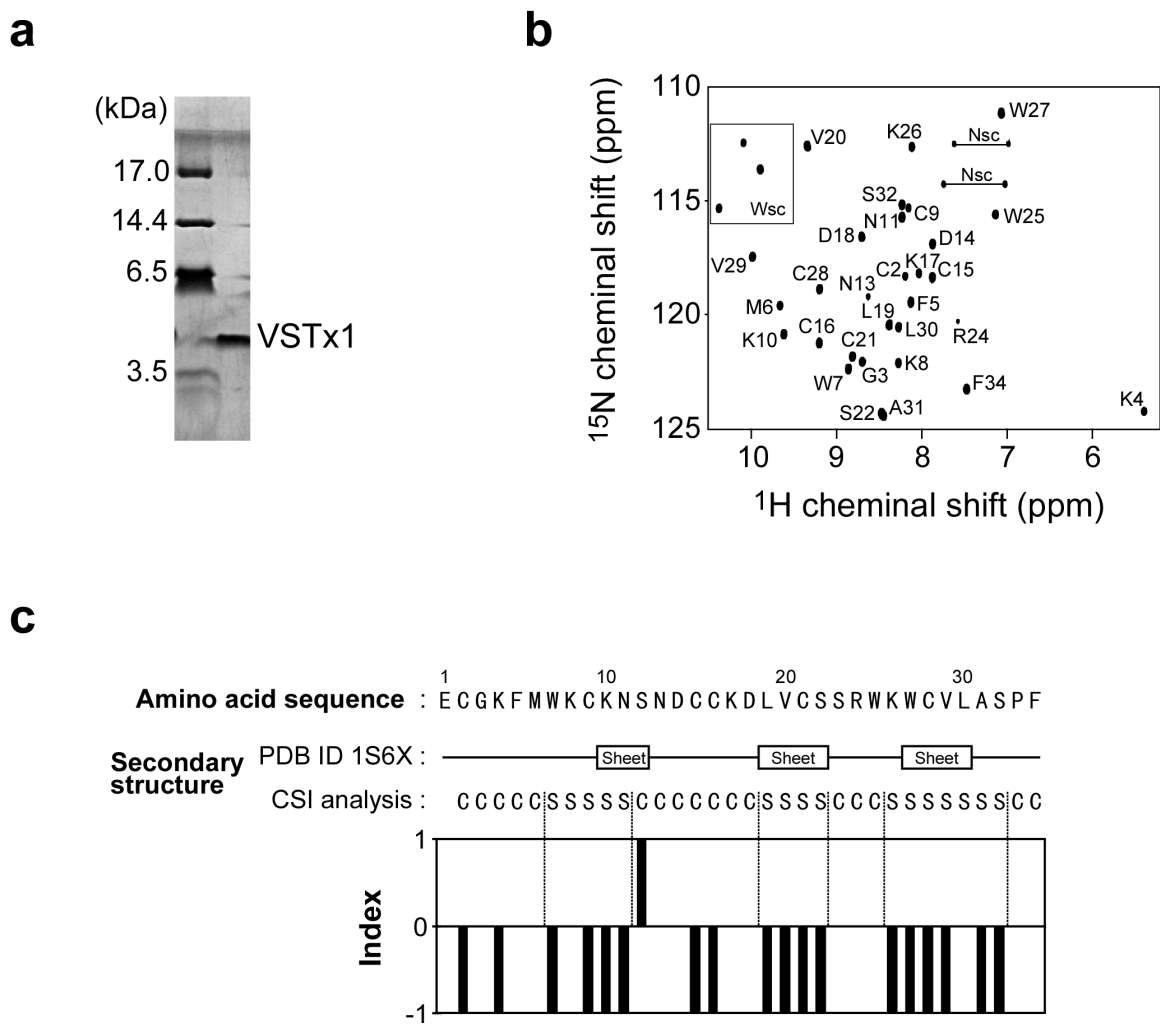

### Supplementary Figure S2: Characterization of VSTx1.

(a) Tricine SDS-PAGE analysis of the purified VSTx1. (b)  $^1\text{H}$ - $^{15}\text{N}$  HSQC spectrum of uniformly  $^{15}\text{N}$ -labeled VSTx1. “sc” indicates side chain signals. (c) The chemical shift index (CSI) of  $^{13}\text{C}\alpha$  of VSTx1. The indices ‘1’ and ‘-1’ indicate the residues in which the measured chemical shift of  $^{13}\text{C}\alpha$  is shifted more than 0.1 ppm upfield and downfield from the standard chemical shift, respectively. Other residues are indexed ‘0’. The secondary structure predicted from CSI values are shown by single letters, ‘C’ and ‘S’, which correspond to coil and sheet, respectively<sup>48</sup>.

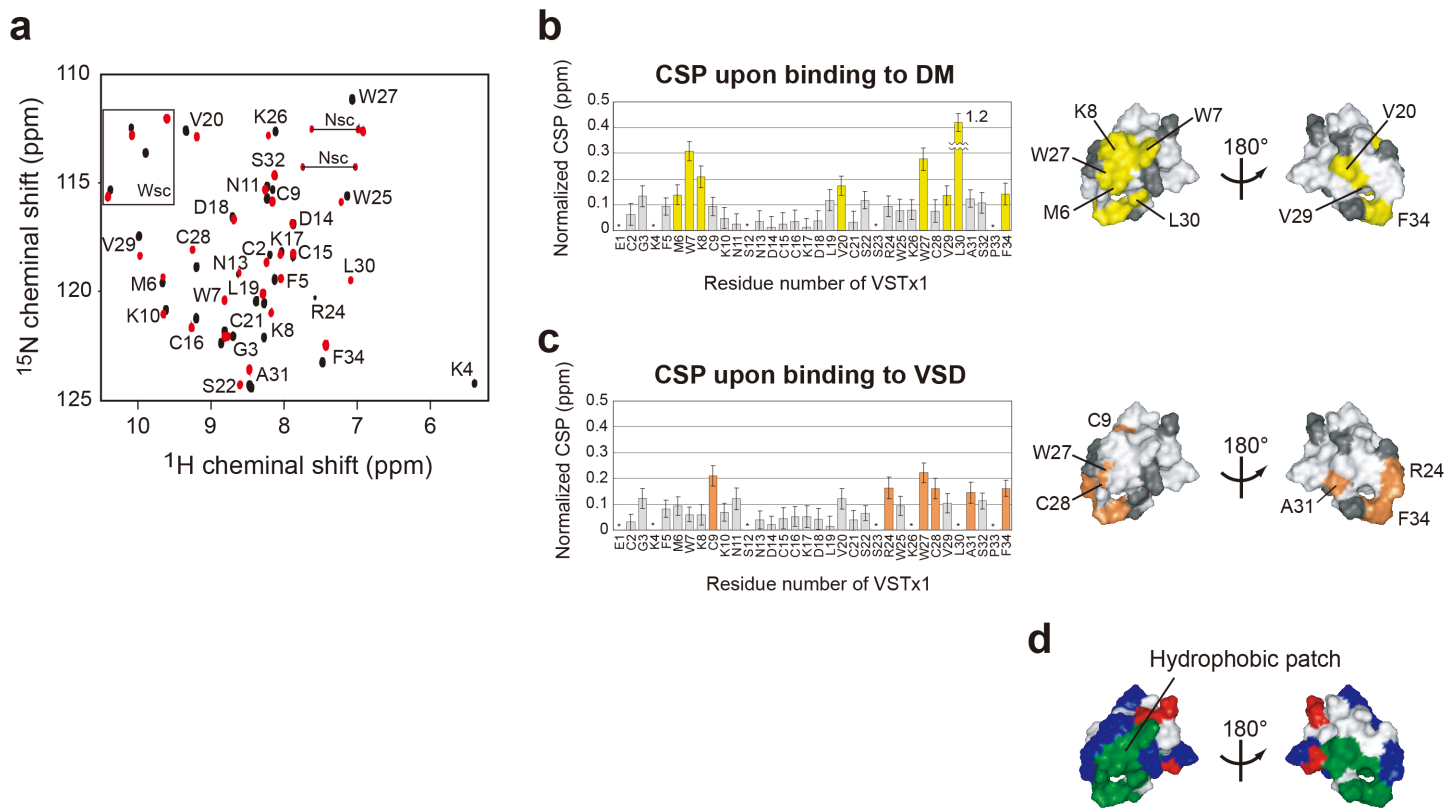

**Supplementary Figure S3: Chemical shift perturbation (CSP) of the backbone amide resonances of VSTx1.**

(a)  $^1\text{H}$ - $^{15}\text{N}$  HSQC spectra of uniformly  $^{15}\text{N}$ -labeled VSTx1 in the absence (black) and presence (red) of 150 mM DM. The signal for Lys 4 disappeared upon binding to DM.

(b, c) Mapping of CSP upon binding to DM (b) and VSD in the presence of 150 mM DM (c). The residues displayed more than 0.1 ppm CSP upon binding to DM and VSD are colored yellow and orange, respectively. Normalized CSP values were calculated according to the formula<sup>49</sup>,  $\{(\Delta\delta_{1\text{H}})^2 + (\Delta\delta_{15\text{N}}/6.5)^2\}^{0.5}$ . Asterisks indicate the residues with no data and error bars are calculated based on the digital resolutions of the spectra.

(d) Surface properties of VSTx1. The acidic, basic and hydrophobic residues are colored red, blue and green, respectively.

**Supplementary Table S1: Assignments of the backbone resonances of VSTx1 at 45 °C.**

| Residue number | Chemical shift (ppm) |            |           |         |
|----------------|----------------------|------------|-----------|---------|
|                | H                    | C $\alpha$ | C $\beta$ | N       |
| C2             | 8.199                | 51.589     | 39.607    | 118.278 |
| G3             | 8.713                | 44.472     | -         | 107.086 |
| K4             | 5.414                | 52.009     | 30.153    | 124.237 |
| F5             | 8.132                | 56.759     | 36.570    | 119.467 |
| M6             | 9.210                | 55.539     | 26.810    | 118.897 |
| W7             | 8.872                | 55.104     | 26.425    | 122.387 |
| K8             | 8.280                | 54.883     | 30.187    | 122.147 |
| C9             | 8.249                | 51.006     | 45.110    | 115.748 |
| K10            | 9.677                | 54.830     | 31.463    | 119.618 |
| N11            | 8.246                | 49.470     | 38.458    | 115.169 |
| S12            | -                    | 60.374     | -         | -       |
| N13            | 8.642                | 52.639     | 35.060    | 119.212 |
| D14            | 7.889                | 53.252     | 40.135    | 116.909 |
| C15            | 7.889                | 51.006     | 39.293    | 118.349 |
| C16            | 9.626                | 51.865     | 37.616    | 120.861 |
| K17            | 8.045                | 56.047     | 30.044    | 118.195 |
| D18            | 8.712                | 54.175     | 36.598    | 116.577 |
| L19            | 8.399                | 52.373     | 42.131    | 120.46  |
| V20            | 9.352                | 56.533     | 33.234    | 112.605 |
| C21            | 8.821                | 52.139     | 37.435    | 121.87  |
| S22            | 8.484                | 55.583     | 61.190    | 124.337 |
| S23            | -                    | 58.241     | 60.156    | -       |
| R24            | 7.591                | 54.884     | 28.184    | 120.291 |
| W25            | 7.146                | 53.684     | 26.228    | 115.601 |
| K26            | 8.135                | 53.708     | 24.977    | 112.634 |
| W27            | 7.085                | 52.647     | 28.276    | 111.151 |
| C28            | 9.217                | 53.919     | 39.135    | 121.258 |
| V29            | 9.995                | 57.222     | 33.356    | 117.494 |
| L30            | 8.272                | 53.940     | 39.629    | 120.584 |

|     |       |        |        |         |
|-----|-------|--------|--------|---------|
| A31 | 8.457 | 50.380 | 16.838 | 124.475 |
| S32 | 8.161 | 53.392 | 61.339 | 115.285 |
| P33 | -     | 60.985 | 29.272 | -       |
| F34 | 7.487 | 56.110 | 37.917 | 123.274 |

**Supplementary Table S2: List of the CS-source candidates on VSD for the cross-saturated amide hydrogen atoms of VSTx1.**

| Cross-saturated amide hydrogen atoms of VSTx1 | V20  | S22  | W25  | S32  | F34  | Maximum deviation (Å) | Group |
|-----------------------------------------------|------|------|------|------|------|-----------------------|-------|
| CS source candidates on VSD                   | I127 | F124 | L128 | L125 | L125 | 3.742                 | 3     |
|                                               | I127 | F124 | L121 | L128 | L128 | 3.828                 | 1*    |
|                                               | I127 | F124 | L121 | L125 | L125 | 3.834                 | 1     |
|                                               | I127 | F124 | L121 | L128 | L125 | 3.897                 | 1     |
|                                               | I130 | F124 | L128 | L125 | L125 | 4.333                 | 2     |
|                                               | I127 | F124 | L128 | L125 | L121 | 4.367                 | 3     |
|                                               | I131 | F124 | L121 | L128 | L125 | 4.444                 | 1     |
|                                               | I127 | F124 | L125 | L128 | L128 | 4.510                 | 3     |
|                                               | I131 | F124 | L121 | L125 | L125 | 4.579                 | 1     |
|                                               | I131 | F124 | L121 | L128 | L128 | 4.589                 | 1     |
|                                               | I127 | F124 | L128 | L125 | L125 | 4.648                 | 3     |
|                                               | I130 | F124 | L128 | L125 | L125 | 4.747                 | 2     |
|                                               | I131 | F124 | L125 | L128 | L128 | 4.832                 | 3     |
|                                               | I131 | F124 | L128 | L125 | L125 | 4.842                 | 3     |
|                                               | I127 | F124 | L128 | L121 | L121 | 4.901                 | 3     |
|                                               | I130 | F124 | L121 | L125 | L125 | 4.922                 | 2     |
|                                               | I130 | F124 | L121 | L128 | L128 | 4.936                 | 2     |
|                                               | I130 | F124 | L128 | L125 | L125 | 4.958                 | 2     |
|                                               | I131 | F124 | L128 | L125 | L125 | 4.968                 | 3     |
|                                               | I130 | F124 | L121 | L128 | L125 | 4.980                 | 2     |

\*The residue pairs utilized in HADDOCK docking

### **Supplementary Table S3: HADDOCK parameters**

---

|                                               |               |
|-----------------------------------------------|---------------|
| HADDOCK score                                 | -53.4 ± 3.9   |
| Cluster size                                  | 48            |
| RMSD from the overall lowest-energy structure | 0.9 ± 0.7     |
| van der Waals energy                          | -43.6 ± 6.4   |
| Electrostatic energy                          | -44.3 ± 18.0  |
| Desolvation energy                            | -1.9 ± 2.3    |
| Restraints violation energy                   | 9.4 ± 12.49   |
| Buried Surface Area                           | 1162.3 ± 78.1 |

---

### **References**

48. Wishart, D.S. & Sykes, B.D. The  $^{13}\text{C}$  chemical-shift index: a simple method for the identification of protein secondary structure using  $^{13}\text{C}$  chemical-shift data. *J. Biomol. NMR* **4**, 171-180 (1994).
49. Mulder, F.A., Schipper, D., Bott, R. & Boelens, R. Altered flexibility in the substrate-binding site of related native and engineered high-alkaline *Bacillus subtilis*ins. *J. Mol. Biol.* **292**, 111-123 (1999).
